# Supplementary material for: Carbon monoxide in clouds at low metallicity in the dwarf irregular galaxy WLM
Source: Springer Nature journal article supplement (doi:10.1038/nature11933), 2013-03-01
Supplement: 41586_2013_BFnature11933_MOESM278_ESM.pdf [file 41586_2013_BFnature11933_MOESM278_ESM.pdf]

**Table 3: (Alternate Method) Derived Quantities for WLM with no sub-mm Excess Correction**

| Source                                         | Reg. | $T$ , K        | $\Sigma$ , $M_{\odot} \text{ pc}^{-2}$ | Mass, $M_{\odot}$                             |
|------------------------------------------------|------|----------------|----------------------------------------|-----------------------------------------------|
| $\beta = 1.2, \alpha_{\text{CO}} = 0.6 \pm 17$ |      |                |                                        |                                               |
| Dust                                           | A    | $16.5 \pm 0.9$ | $0.025 \pm 0.007$                      | $2.2 \pm 0.6 \times 10^2$                     |
| Gas                                            | A    |                | $(27 \pm 7)\delta_{\text{GD}}$         | $(2.4 \pm 0.6 \times 10^5)\delta_{\text{GD}}$ |
| HI                                             | A    |                | $27.3 \pm 1.4$                         | $2.4 \pm 0.1 \times 10^5$                     |
| H <sub>2</sub>                                 | A    |                | $0.15 \pm 7$                           | $0.09 \pm 4.2 \times 10^4$                    |
| H <sub>2</sub>                                 | B    |                | $0.1 \pm 4.7$                          | $0.06 \pm 2.6 \times 10^4$                    |
| $\beta = 1.4, \alpha_{\text{CO}} = 72 \pm 47$  |      |                |                                        |                                               |
| Dust                                           | A    | $15.2 \pm 0.7$ | $0.041 \pm 0.011$                      | $3.6 \pm 0.9 \times 10^2$                     |
| Gas                                            | A    |                | $(45 \pm 12)\delta_{\text{GD}}$        | $(3.9 \pm 1.0 \times 10^5)\delta_{\text{GD}}$ |
| H <sub>2</sub>                                 | A    |                | $18 \pm 12$                            | $1.0 \pm 0.7 \times 10^5$                     |
| H <sub>2</sub>                                 | B    |                | $11.6 \pm 7.5$                         | $6.7 \pm 4.4 \times 10^4$                     |
| $\beta = 1.6, \alpha_{\text{CO}} = 186 \pm 75$ |      |                |                                        |                                               |
| Dust                                           | A    | $14.1 \pm 0.6$ | $0.067 \pm 0.017$                      | $5.8 \pm 1.5 \times 10^2$                     |
| Gas                                            | A    |                | $(74 \pm 19)\delta_{\text{GD}}$        | $(6.4 \pm 1.6 \times 10^5)\delta_{\text{GD}}$ |
| H <sub>2</sub>                                 | A    |                | $46 \pm 19$                            | $2.7 \pm 1.1 \times 10^5$                     |
| H <sub>2</sub>                                 | B    |                | $30 \pm 12$                            | $1.7 \pm 0.7 \times 10^5$                     |
